# Supplementary material for: VHL loss reprograms the immune landscape to promote an inflammatory myeloid microenvironment in renal tumorigenesis
Source: JCI journal article supplement (doi:10.1172/jci173934), 2024-04-14

# Original unedited western blots

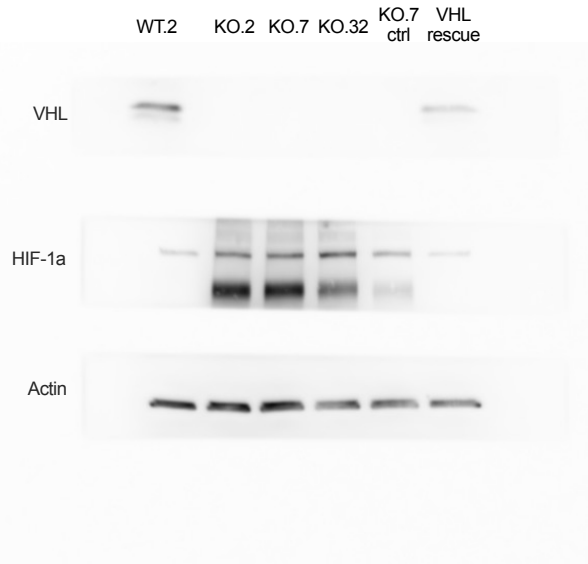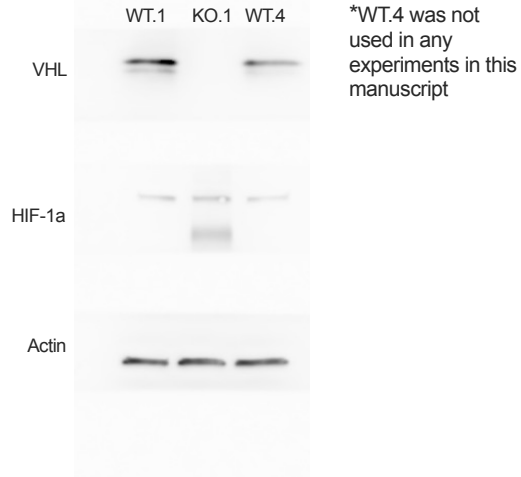

Supplement: sd2 [file 2]
